spinal anaesthesia for Caesarean section: Left 15 degree table tilt vs. left lateral. *Anaesthesia* 2002; 57:15–20

8. Ngan Kee WD, Lee A, Khaw KS, Ng FF, Karmakar MK, Gin T: A randomized double-blinded comparison of phenylephrine and ephedrine infusion combinations to maintain blood pressure during spinal anesthesia for cesarean delivery: The effects on fetal acid-base

status and hemodynamic control. *Anesth Analg* 2008; 107:1295–302

9. Kinsella SM, Lohmann G: Supine hypotensive syndrome. *Obstet Gynecol* 1994; 83:774–88
10. Lees MM, Scott DB, Kerr MG, Taylor SH: The circulatory effects of recumbent postural change in late pregnancy. *Clin Sci* 1967; 32:453–65

## ANESTHESIOLOGY REFLECTIONS FROM THE WOOD LIBRARY-MUSEUM

### Stramonium for Extending the Anesthetic Duration of Nitrous Oxide

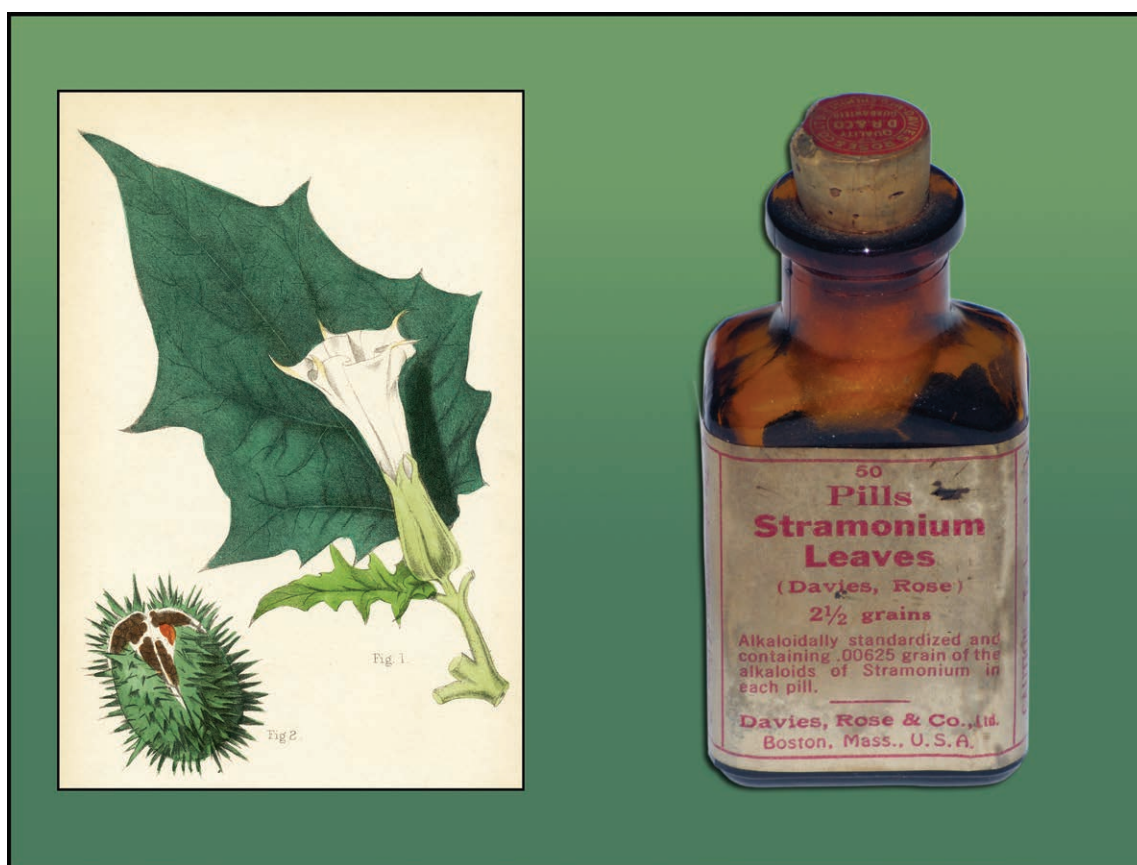

In 1676, English colonists observed the sedative and hallucinogenic effects of *Datura stramonium* on soldiers at Jamestown, Virginia, who had ingested what was later popularized as Jamestown Weed or Jimsonweed (*left*). Other nicknames followed based on this nightshade's night-blooming ("Moon Flower"), funnel-shaped flowers ("Hell's Bells" or "Devil's Trumpet"), each of which, once moth pollinated, are replaced by a spiny ovoid fruit ("Thornapple," "Pricklyburr," or "Devil's Cucumber"). Frustrated in the mid-1880s with nitrous oxide's brief anesthetic duration, some clinicians supplemented laughing gas anesthesia with herbal sedatives, such as *D. stramonium*. As enthusiasm waned for herbally supplemented nitrous oxide, physicians continued prescribing stramonium leaves (*right*)—a perilous anticholinergic slurry of scopolamine, hyoscyamine, and atropine—as an anodyne and an antispasmodic, especially for asthmatic patients. (Copyright © the American Society of Anesthesiologists' Wood Library-Museum of Anesthesiology.)

George S. Bause, M.D., M.P.H., Honorary Curator and Laureate of the History of Anesthesia, Wood Library-Museum of Anesthesiology, Schaumburg, Illinois, and Clinical Associate Professor, Case Western Reserve University, Cleveland, Ohio. UJYC@aol.com.
